# Supplementary material for: Extracranial Carotid Plaque Hemorrhage Is Independently Associated With Poor 3-month Functional Outcome After Acute Ischemic Stroke—A Prospective Cohort Study
Source: Frontiers journal article supplement (doi:10.3389/fneur.2021.780436), 2021-12-14
Supplement: Data_Sheet_1.XLS [file Data_Sheet_1.XLS]

## Sheet: CCA-IPH-3 month outcome
name	入组time_1	gender	age	Hypertension	DM	CHD	高脂血症	strokeorTIA	PAD	smoke	alcohol	家族史	preanticoagulantdrugs	preantihypertensiondrugs	prestatins	preantiplatedrugs	preHypoglycemicdrugs	CRP	Hcy	TG	TC	LDL	HDL	SYS1	DYS1	SYS2	DYS2	SYS3	DYS3	threemonthfpllowuptime	firstNIHSS	twentyfourhNIHSS	fortyeighthHIHSS	oneweekNIHSS	twoweeksNIHSS	initialmRS	onemonthmRS	twomonthmRS	threemonthmRS_00	threemonthfollowup	threemonthendpoints	threeoutcome	是否有早期原有卒中进展	住院期间事件	是否有早期卒中复发	是否有脑梗死出血转化	是否有其他并发症	狭窄率（面积法）	狭窄程度
liufuqian	2012-02-13	1	69.9209	1	0	0	0	0	0	1	0	0	0	0	0	0	0	4.9	37.4	1.14	2.81	1.55	0.82	130	80	125	80	125	80	2012-05-06	4	10	9	8	8	1	3	3	3	83	1	1	1	1	0	0	0	0.786512	3
tanhongling	2012-03-04	1	76.9177	1	1	0	0	0	0	1	0	0	0	1	0	0	0	8.2	19.69	1.4	5.3	1.02	3.69	160	80	150	80	160	80	2012-06-05	1	7	6	6	6	0	3	3	3	93	1	1	1	1	0	0	0	0.645888	2
zhangfue	2011-12-19	1	63.0805	1	0	0	1	0	0	1	0	0	0	1	1	1	1	14.3	20.1	1	2.67	1.18	0.91	140	70	130	70	140	85	2012-03-22	7	11	10	9	8	1	3	3	3	94	0	1	1	1	0	0	0	0.666694	2
guoxianzhang	2011-01-30	1	54.0611	1	1	0	1	0	0	0	0	0	0	1	0	0	1	9.8	21.2	3.89	4.79	2.33	0.92	150	80	140	80	140	90	2011-05-01	0	1	1	3	3	0	1	3	3	91	1	1	0	2	1	0	0	0.754353	3
liushucai	2011-10-27	0	71.0026	1	1	0	0	0	0	0	0	0	0	0	0	0	0	6.4	26.19	1.29	4.02	2.33	1.75	140	70	140	80	140	80	2012-01-21	0	2	2	6	6	0	3	3	3	86	0	1	0	2	1	0	0	0.714824	3
lishaosen	2012-02-28	0	75.9125	0	0	1	0	0	0	1	0	0	0	0	0	0	0	4.7	25.47	1.43	3.59	1.85	1.1	132	78	122	67	139	79	2012-06-01	6	9	9	11	9	2	4	4	3	94	0	1	0	2	1	0	0	0.850316	3
wangguiying	2012-06-03	1	64.9999	1	1	0	0	0	0	1	0	0	0	1	0	0	1	3.42	12.24	#NULL!	#NULL!	#NULL!	#NULL!	130	80	128	78	130	80	2012-09-10	4	7	6	8	6	0	3	3	3	99	0	1	0	2	1	0	0	0.571113	2
wuyusheng	2012-07-19	0	70.0492	1	1	0	0	0	0	1	0	0	0	1	0	0	0	2.9	13.6	2.19	3.97	2.03	0.87	155	88	142	87	157	88	2012-10-20	8	8	7	8	8	2	4	3	3	93	0	1	0	2	1	0	0	0.616599	2
baisuying	2012-03-19	1	62.9903	0	0	0	1	1	0	0	0	0	0	0	0	0	0	6.8	29.19	0.72	4.19	3	1.24	140	90	140	85	145	75	2012-06-25	7	9	9	8	8	1	4	3	3	98	1	1	0	4	0	0	1	0.695731	3
jinguoxiang	2012-02-27	1	49.0126	1	1	0	1	0	0	0	1	1	0	1	0	0	1	2.7	13.8	2.62	5.68	3.66	1.23	135	80	130	80	180	90	2012-06-02	7	9	8	8	7	0	4	3	3	96	0	1	0	4	0	0	1	0.678392	2
lishulan	2012-06-19	1	66.9517	0	0	0	0	0	0	1	1	0	0	0	0	0	0	1	27.85	1.68	6.9	3.97	1.41	130	80	130	80	120	80	2012-09-23	7	10	9	9	8	2	4	3	3	96	0	1	0	4	0	0	1	0.448007	1
wangzongwu	2012-02-22	1	56.9612	1	1	0	0	0	0	0	0	0	0	1	0	0	1	1.8	10.1	#NULL!	#NULL!	#NULL!	#NULL!	160	90	146	90	150	85	2012-05-24	3	0	0	0	0	0	0	0	0	92	1	0	0	0	0	0	0	0.760747	3
zhangshurong	2012-05-17	1	60.9905	1	1	0	0	0	0	1	0	0	0	0	0	0	0	0	19.1	3	5.85	3.61	0.94	#NULL!	#NULL!	#NULL!	#NULL!	#NULL!	#NULL!	2012-08-23	3	0	0	0	0	0	0	0	0	98	1	0	0	0	0	0	0	0.630937	2
liliansheng	2012-07-05	1	57.9874	0	0	0	1	1	0	0	0	1	0	0	0	0	0	2.3	61.7	1.75	4.29	2.48	1.22	105	80	100	80	110	75	2012-10-08	2	0	0	0	0	2	0	0	0	95	1	0	0	0	0	0	0	0.814511	3
zhangxiuhua	2011-08-10	1	62.0004	0	0	0	1	0	0	1	1	0	0	0	0	0	0	0.5	10.52	#NULL!	#NULL!	#NULL!	#NULL!	110	70	120	70	120	82	2011-11-10	5	4	4	2	2	1	1	0	0	92	0	0	0	0	0	0	0	0.427129	1
yanghongshan	2013-09-22	1	53.0406	0	0	0	0	0	0	0	1	0	0	0	0	0	0	4.58	21.3	1.31	3.4	1.88	0.88	123	81	#NULL!	#NULL!	#NULL!	#NULL!	2013-12-22	3	2	2	3	2	0	0	0	0	91	1	0	0	2	1	0	0	0.715921	3
liyanglin	2011-12-06	1	65.048	1	0	1	1	0	0	0	0	0	0	1	0	0	1	1.1	23.3	1.1	2.52	1.36	0.97	160	90	138	80	113	71	2012-03-09	3	3	3	4	3	1	0	0	0	94	0	0	0	2	1	0	0	0.484459	1
xujiuchen	2012-04-26	1	74.0004	1	0	0	0	1	0	1	0	0	0	1	0	1	0	0.6	10.5	0.92	3.12	1.82	1.02	100	60	145	70	140	70	2012-07-30	3	0	0	2	2	1	0	0	0	95	0	0	0	2	1	0	0	0.920612	3
liuzengshan	2012-06-11	0	71.9383	1	1	0	0	0	0	0	0	0	0	1	0	0	1	1.6	11.5	2.53	6.01	3.76	1.15	138	72	105	61	135	80	2012-09-14	3	1	1	3	3	1	0	0	0	95	0	0	0	2	1	0	0	0.786115	3
wangcai	2013-06-16	1	78.0315	0	0	0	0	0	0	1	0	0	0	0	0	0	0	4.78	21.3	1.14	4.78	3.04	0.88	#NULL!	#NULL!	#NULL!	#NULL!	#NULL!	#NULL!	2013-09-12	3	2	2	3	2	0	0	0	0	88	0	0	0	2	1	0	0	0.558921	2
pengshuying	2013-10-16	1	76.05	1	1	0	0	0	0	0	0	0	0	1	0	0	0	3.3	16.3	1.19	4.18	2.51	1.04	180	103	#NULL!	#NULL!	#NULL!	#NULL!	2014-01-15	2	2	2	3	2	1	0	0	0	91	0	0	0	2	1	0	0	0.305211	1
liuyangpeng	2012-02-13	1	55.9898	1	0	0	0	0	0	1	1	0	0	0	0	0	0	3.6	22.5	0.67	4.44	2.99	1.22	160	100	160	95	160	100	2012-05-12	3	3	2	2	2	1	1	1	1	89	1	0	0	0	0	0	0	0.661394	2
lidezhi	2011-12-09	1	77.0186	1	0	0	0	0	0	1	1	0	0	1	0	0	0	5.3	16.3	0.74	2.85	1.51	0.72	162	64	210	100	175	94	2012-03-15	3	7	4	4	3	1	1	0	1	97	1	0	1	1	0	0	0	0.750757	3
anqingde	2013-11-09	1	74.0981	0	0	0	0	0	0	1	0	0	0	0	0	0	0	1	26.3	0.79	4.88	#NULL!	#NULL!	130	85	130	80	130	80	2014-02-15	3	7	6	4	4	1	2	1	1	98	1	0	1	1	0	0	0	0.513992	2
liguangai	2012-04-05	1	71.9193	1	0	0	0	0	0	1	0	0	0	1	0	1	0	1.1	15	0.92	3.09	1.96	1.01	160	90	166	96	158	78	2012-07-10	4	4	4	6	4	0	2	1	1	96	0	0	0	2	1	0	0	0.803688	3
caodafang	2011-11-22	1	72.0617	1	0	0	0	0	0	1	0	0	0	1	0	0	0	1.1	19.9	1.91	3.4	1.68	0.85	155	70	150	70	120	75	2012-02-20	6	6	5	5	5	2	2	2	2	90	1	0	0	0	0	0	0	0.827996	3
zhanghuichi	2011-10-02	1	60.049	1	0	0	0	0	0	0	1	0	0	1	0	0	0	17.9	15.8	1.26	3.41	1.39	1.39	180	110	185	120	180	110	2011-12-30	7	5	5	4	5	0	2	2	2	89	0	0	0	0	0	0	0	0.545925	2
liujizhong	2012-03-04	1	58.929	1	1	0	0	0	0	0	0	0	0	1	0	0	1	1	21.17	1.56	4.59	2.88	1.14	170	80	160	80	160	80	2012-06-04	4	4	4	5	4	1	2	2	2	92	1	0	0	2	1	0	0	0.582812	2
daijiafu	2012-11-20	1	62.0903	1	1	0	0	1	0	1	1	0	0	1	1	1	0	2.12	38	1.83	5.48	4.13	1.17	130	80	140	90	130	70	2013-02-22	3	2	2	3	2	2	2	2	2	94	1	0	0	2	1	0	0	0.510817	2
lihoufang	2011-10-02	1	76.0087	1	1	0	0	0	0	1	1	0	0	0	0	0	0	6	13.4	1.26	4.45	2.16	1.44	#NULL!	#NULL!	#NULL!	#NULL!	#NULL!	#NULL!	2011-12-28	4	3	3	4	3	2	2	2	2	87	0	0	0	2	1	0	0	0.547192	2
sunyulan	2012-08-28	1	61.9597	1	0	0	0	1	0	1	0	0	0	0	0	0	0	5.2	13.51	0.62	4.83	2.44	2.39	150	80	145	80	140	80	2012-11-27	3	7	7	6	6	1	3	3	3	91	1	1	1	1	0	0	0	0.571288	2
wumingshi	2011-11-06	1	80.0702	0	0	0	0	0	1	1	1	0	0	0	0	0	0	4.4	31.7	2.26	4.79	3	1.16	170	100	160	90	130	90	2012-02-10	6	9	9	7	7	2	3	3	3	96	1	1	0	2	1	0	0	0.618993	2
liuxuejun	2012-08-10	0	61	1	1	0	0	0	0	0	0	0	0	1	0	0	0	9.26	24.3	1.11	5.49	3.01	1.35	160	100	150	100	170	90	2012-11-14	5	6	5	6	6	1	3	3	3	96	1	1	0	2	1	0	0	0.751211	3
luoshucai	2012-10-23	0	42.06	1	0	0	0	1	0	0	1	1	0	1	1	1	0	3.8	17.7	1.67	3.31	1.73	1.03	150	80	120	80	110	80	2013-01-28	9	12	13	12	9	1	4	3	3	97	1	1	0	2	1	0	0	0.744115	3
wangyunsheng	2013-12-31	0	61.0727	1	1	0	0	0	0	0	0	0	0	1	0	0	1	6.12	19.5	1.59	4.6	3.32	1.18	#NULL!	#NULL!	#NULL!	#NULL!	#NULL!	#NULL!	2014-04-02	6	8	8	7	7	1	3	3	3	92	1	1	0	2	1	0	0	0.857494	3
wangguilan	2012-04-23	0	64.011	1	1	0	0	0	0	0	0	0	0	0	0	0	0	1.3	31.8	1.3	3.61	2.04	1.25	146	75	130	70	140	70	2012-07-30	5	9	8	8	8	1	4	4	3	98	1	1	0	4	0	0	1	0.567331	2
weixuebin	2012-11-12	1	60.9886	0	1	0	0	0	0	1	1	0	0	0	0	0	1	5.72	19.2	1.37	4.19	1.98	0.9	165	85	100	60	137	71	2013-02-14	7	9	9	8	8	2	4	3	3	94	1	1	0	4	0	0	1	0.64269	2
penghuaiyu	2012-11-12	1	61.0383	1	1	0	0	0	0	1	0	0	0	1	0	0	1	9.33	15.24	1.19	4.17	2.34	1.07	159	97	132	78	153	90	2013-02-16	7	9	8	8	7	0	4	3	3	96	1	1	0	4	0	0	1	0.668256	2
fanchangli	2013-04-02	1	69.03	1	0	0	0	0	0	1	1	0	0	0	0	0	0	4.42	24.2	1.36	5.69	3.9	0.96	125	90	130	90	#NULL!	#NULL!	2013-07-06	8	10	9	9	8	2	4	4	3	95	1	1	0	4	0	0	1	0.598229	2
jiaoxiulian	2013-12-31	1	73	0	0	0	1	1	0	0	0	0	0	0	0	0	0	5	17.1	0.64	3.54	2.38	0.9	#NULL!	#NULL!	#NULL!	#NULL!	#NULL!	#NULL!	2014-04-02	7	9	9	8	8	0	4	4	3	92	1	1	0	4	0	0	1	0.736157	3
lideyu	2012-03-07	0	68.9584	1	0	0	0	1	0	0	0	0	0	1	0	0	0	7.9	14.7	1	3.8	2.24	1.22	130	90	140	90	130	90	2012-06-12	8	10	9	8	8	2	4	4	3	97	0	1	0	4	0	0	1	0.406332	1
wangjianming	2012-06-18	0	65.9903	1	1	1	1	0	0	0	0	0	0	1	1	1	1	3.8	11.3	1.93	4.83	2.74	1.01	146	91	132	82	135	77	2012-09-22	7	7	7	8	8	0	4	4	4	96	1	1	0	2	1	0	0	0.537723	2
weiguoxin	2013-04-03	1	76.0201	1	1	1	0	0	0	1	0	0	0	0	0	0	1	6.41	22.7	1.05	3.82	2.53	1.01	196	100	210	100	#NULL!	#NULL!	2013-07-04	10	13	13	12	12	2	5	4	4	92	1	1	0	3	0	1	0	0.627867	2
yangdaqing	2012-05-23	0	57.9714	1	0	0	0	0	0	0	0	0	0	1	0	0	0	5.2	17.5	1	4.12	2.8	1.12	145	69	140	70	120	68	2012-08-27	8	15	14	12	11	2	5	5	4	96	1	1	0	4	0	0	1	0.393036	1
lisufen	2012-07-24	1	55.9614	0	0	0	1	1	0	1	0	0	0	0	0	1	0	5.12	15.3	1.25	4.23	2.79	0.92	130	70	120	80	120	70	2012-10-25	9	11	10	10	10	0	5	4	4	93	1	1	0	4	0	0	1	0.610142	2
liuchangli	2012-08-15	1	58.0588	0	0	0	0	0	0	0	1	0	0	0	0	0	0	6.8	32.6	0.97	3.78	1.7	1.29	135	80	110	70	120	70	2012-11-14	9	12	13	12	12	1	5	4	4	91	1	1	0	4	0	0	1	0.741525	3
caochunhui	2013-02-28	1	50.9213	0	1	0	0	1	0	0	0	0	0	0	1	1	0	6.4	23.5	0.84	3.91	2.71	1.09	140	80	140	70	130	80	2013-05-28	8	14	13	12	12	0	5	4	4	89	1	1	0	4	0	0	1	0.646104	2
fangyaoru	2013-08-28	0	64.0413	1	0	0	0	0	0	0	0	0	0	1	0	0	0	3.16	20.9	1.19	5.33	3.53	1.26	161	88	149	93	#NULL!	#NULL!	2013-11-30	10	11	10	10	10	2	5	4	4	94	1	1	0	4	0	0	1	0.742099	3
liangli	2012-06-28	1	68	0	1	0	0	0	0	1	1	0	0	0	0	0	1	15	28.88	1.08	1.98	0.71	0.78	108	66	121	78	120	80	2012-09-25	12	15	15	14	12	2	5	5	4	89	0	1	0	4	0	0	1	0.715182	3
zhangshengli	2012-08-16	1	64.9811	1	0	0	0	0	0	1	1	1	0	1	0	0	0	7.3	15.9	1.37	4.51	2.56	1.01	119	97	130	80	120	85	2012-11-20	12	18	17	16	16	1	5	5	5	96	1	1	0	3	0	1	0	0.543142	2
anbaozhu	2013-04-18	1	71.0111	0	0	0	0	0	0	1	1	0	0	0	0	0	0	8.44	53.1	0.94	3.87	2.45	0.98	180	110	185	100	#NULL!	#NULL!	2013-07-20	9	11	11	10	10	2	5	5	5	93	1	1	0	3	0	1	0	0.653607	2
kongqingfei	2011-06-15	1	60.0501	0	0	0	0	0	0	1	1	0	0	0	0	0	0	6	14.2	8.44	4.91	1.63	0.74	140	85	130	80	130	85	2011-09-15	3	1	1	0	0	1	0	0	0	92	1	0	0	0	0	0	0	0.696995	3
wuliancheng	2011-11-24	1	62.0204	1	0	0	0	0	0	0	0	0	0	0	0	0	0	5.8	12.3	1.9	4.33	2.17	0.81	140	80	140	85	135	80	2012-02-25	3	0	0	0	0	0	0	0	0	93	1	0	0	0	0	0	0	0.633058	2
liuyongming	2011-11-29	0	69.0189	1	1	1	0	0	0	1	0	0	0	1	0	0	1	10.1	21.4	1.03	5.38	3.78	1.13	140	90	145	100	140	90	2012-03-01	2	1	1	0	0	2	0	0	0	93	1	0	0	0	0	0	0	0.38375	1
liangwenping	2011-11-30	1	53.0423	0	0	0	1	0	0	1	0	0	0	0	0	0	0	1.1	75	1.79	5.3	3.77	0.92	128	72	125	70	125	75	2012-03-01	3	0	0	0	0	1	0	0	0	92	1	0	0	0	0	0	0	0.635937	2
gaochangshan	2011-12-26	1	54.0216	1	0	0	0	1	0	1	0	0	0	1	0	0	0	5.1	16.8	1.31	3.27	1.63	0.78	145	92	137	89	125	83	2012-03-27	2	0	0	0	0	1	0	0	0	92	1	0	0	0	0	0	0	0.57938	2
liushijun	2012-01-21	1	57.9118	0	0	0	0	0	0	0	1	0	0	0	0	0	0	7.4	26.4	1.05	5.32	4.47	0.96	150	100	130	80	130	100	2012-04-26	4	3	3	2	2	2	1	1	0	96	1	0	0	0	0	0	0	0.749541	3
yindaqing	2012-02-01	1	46.9597	0	1	0	1	1	0	0	0	1	0	0	1	1	0	3.2	18.43	1.7	2.45	0.88	0.83	136	70	138	72	140	70	2012-05-21	3	0	0	0	0	1	0	0	0	110	1	0	0	0	0	0	0	0.94712	3
liqinggang	2012-02-08	1	62.0004	0	1	0	0	0	0	1	0	0	0	0	0	0	0	1.94	23.1	5.65	4.92	1.84	1	136	76	145	80	140	75	2012-05-10	5	4	3	3	3	2	2	1	0	92	1	0	0	0	0	0	0	0.731348	3
songqiangguo	2012-03-05	0	64	1	1	0	1	0	0	0	0	0	0	0	0	0	1	15.9	9.27	1.72	2.55	1.24	0.9	140	100	162	99	160	90	2012-06-10	3	3	2	2	2	2	1	0	0	97	1	0	0	0	0	0	0	0.575588	2
shiguangping	2012-03-15	0	47.9311	1	0	0	1	0	0	0	0	0	0	1	0	0	0	8.8	11.1	2.41	4.25	2.65	0.91	#NULL!	#NULL!	#NULL!	#NULL!	#NULL!	#NULL!	2012-06-21	3	3	2	2	1	1	0	0	0	98	1	0	0	0	0	0	0	0.56455	2
wanghui	2012-03-17	1	56.9076	1	1	0	0	0	0	1	1	0	0	1	0	0	1	2.5	11.5	3.49	6.79	4.43	1.27	160	100	170	110	160	100	2012-06-20	3	0	0	0	0	1	0	0	0	95	1	0	0	0	0	0	0	0.674681	2
wangxiulong	2012-04-05	1	47.9201	1	0	1	1	0	0	0	1	0	0	1	0	0	0	0.6	34.6	2.93	4.66	2.62	1.16	140	80	160	70	160	110	2012-07-06	3	0	0	0	0	0	0	0	0	92	1	0	0	0	0	0	0	0.455765	1
fengzhenkuan	2012-04-10	1	59.9707	0	1	0	0	0	0	1	0	0	0	0	0	0	0	0.66	#NULL!	3.74	4.65	3.21	1.12	160	100	140	90	140	90	2012-07-04	2	0	0	0	0	2	0	0	0	85	1	0	0	0	0	0	0	0.615635	2
yangyamin	2012-04-20	1	32.9895	0	0	0	0	0	0	1	1	1	0	0	0	0	0	0.7	26.2	1.17	3.43	1.94	1.16	120	80	120	80	126	80	2012-07-28	3	0	0	0	0	0	0	0	0	99	1	0	0	0	0	0	0	0.526673	2
xuguiqin	2012-05-14	1	45.9802	1	0	0	1	0	0	1	0	1	0	1	0	0	0	0.6	34	1.11	3.71	2.23	0.93	161	108	135	87	146	97	2012-08-18	3	0	0	0	0	2	0	0	0	96	1	0	0	0	0	0	0	0.684106	2
wuzhiyue	2012-05-17	0	48.0395	1	1	0	1	0	0	0	0	1	0	1	0	0	0	0.8	8.29	1.1	2.44	0.97	1.17	140	90	140	90	140	90	2012-08-22	3	0	0	0	0	1	0	0	0	97	1	0	0	0	0	0	0	0.8019	3
fengyongnian	2012-05-24	1	51.9822	1	0	0	1	1	0	0	0	0	0	0	0	0	0	0.2	41.2	1.29	4.64	3.02	1.12	156	105	150	85	150	75	2012-08-28	3	0	0	0	0	1	0	0	0	96	1	0	0	0	0	0	0	0.504229	2
lijinzhu	2012-05-29	1	52.9811	0	0	0	1	0	0	0	0	1	0	0	0	0	0	0	16.8	1.9	3.94	2.53	0.98	160	80	180	70	130	70	2012-09-04	4	4	3	3	2	0	1	0	0	98	1	0	0	0	0	0	0	0.363475	1
duyaqin	2012-06-27	1	47.9503	0	0	0	0	0	0	1	0	0	0	0	0	0	0	1.9	9.28	1.4	4.23	2.56	1.11	140	90	110	70	110	75	2012-09-30	3	0	0	0	0	1	0	0	0	95	1	0	0	0	0	0	0	0.525451	2
zhangdeming	2012-06-29	1	53.0202	1	0	0	1	0	0	0	1	0	0	0	0	0	0	0.4	12.4	1.96	4.33	2.8	0.82	130	80	130	80	120	80	2012-09-30	3	2	2	1	0	2	0	0	0	93	1	0	0	0	0	0	0	0.690054	2
chenliansheng	2012-07-01	1	61.989	1	1	1	0	0	0	0	0	0	0	1	1	1	1	1	14.9	1	3.53	#NULL!	#NULL!	150	90	145	90	145	90	2012-09-20	3	0	0	0	0	2	0	0	0	81	1	0	0	0	0	0	0	0.741268	3
liguifang	2012-07-03	1	37.0373	0	0	0	1	0	0	0	1	0	0	0	0	0	0	0	11.8	3.36	4.78	2.16	0.86	140	100	140	100	130	80	2012-10-10	5	5	4	3	3	1	2	1	0	99	1	0	0	0	0	0	0	0.538879	2
wubin	2012-07-03	0	78.0596	1	0	0	0	0	0	0	0	0	0	1	0	0	0	10.4	21.2	1.79	5.48	3.77	0.82	140	90	120	80	120	70	2012-10-05	3	0	0	0	0	0	0	0	0	94	1	0	0	0	0	0	0	0.635209	2
wangzhiye	2012-07-05	0	63.0097	1	0	1	1	0	0	0	0	0	0	1	0	0	0	1.02	14.45	1.21	4.23	#NULL!	#NULL!	190	100	185	100	180	100	2012-10-05	3	3	2	2	2	0	1	0	0	92	1	0	0	0	0	0	0	0.593582	2
licheng	2012-08-28	1	66.0702	1	1	0	0	0	0	1	0	1	0	0	0	0	1	1	#NULL!	1.84	5.13	3.73	1.02	150	80	140	80	145	80	2012-11-28	3	0	0	0	0	2	0	0	0	92	1	0	0	0	0	0	0	0.641319	2
zhangxinggui	2012-08-30	0	62.9629	1	0	0	0	0	0	0	0	0	0	1	0	0	0	0.7	16	3.93	5.18	2.2	0.95	120	80	140	90	120	80	2012-12-05	4	0	0	0	0	0	0	0	0	97	1	0	0	0	0	0	0	0.565499	2
houshuying	2012-09-12	0	54.0401	1	0	0	1	0	0	0	0	0	0	1	0	0	0	1.12	17	1.46	5.11	3.77	1.12	130	90	130	70	110	80	2012-12-16	3	1	1	0	0	2	0	0	0	95	1	0	0	0	0	0	0	0.778933	3
jiangxiuqing	2012-11-16	1	47.9904	1	1	0	1	0	0	0	0	0	0	0	0	0	0	4.8	19.8	1.75	4.18	3.3	0.99	140	90	145	90	140	90	2013-02-14	5	4	3	3	2	1	2	1	0	90	1	0	0	0	0	0	0	0.580546	2
chengheyong	2013-02-28	1	54.902	0	0	1	1	1	0	0	0	0	0	0	0	0	0	1.9	17.2	1.49	3.12	1.87	1.29	100	60	110	70	110	70	2013-05-28	2	1	1	0	0	2	0	0	0	89	1	0	0	0	0	0	0	0.52404	2
kongyao	2013-04-03	1	57.9477	1	0	0	0	0	0	1	1	0	0	1	0	0	0	3.24	16.6	1.58	4.03	2.44	1.11	152	100	160	108	#NULL!	#NULL!	2013-07-10	4	3	2	2	2	2	1	0	0	98	1	0	0	0	0	0	0	0.623771	2
liyaru	2013-06-19	0	65.94	1	0	0	0	0	0	0	0	1	0	1	1	1	0	4.9	13.4	1.94	3.84	2.22	0.9	150	90	140	90	140	90	2013-09-19	3	0	0	0	0	0	0	0	0	92	1	0	0	0	0	0	0	0.606487	2
zhangjingchuan	2013-06-24	0	43.02	0	0	0	1	0	0	0	0	1	0	0	0	0	0	2.6	26	2.32	4.68	3.15	0.8	140	90	150	100	140	80	2013-09-26	4	0	0	0	0	0	0	0	0	94	1	0	0	0	0	0	0	0.676626	2
gaomin	2013-07-09	1	62.9984	1	1	0	0	1	0	1	0	0	0	0	1	1	1	1	23.9	1.62	4.96	3.22	0.76	#NULL!	#NULL!	#NULL!	#NULL!	#NULL!	#NULL!	2013-10-12	3	0	0	0	0	1	0	0	0	95	1	0	0	0	0	0	0	0.675393	2
niuguiqing	2013-09-02	1	48.0791	0	0	0	1	0	0	0	1	0	0	0	0	0	1	1.7	19.6	2.16	3.73	2.18	0.68	137	85	#NULL!	#NULL!	#NULL!	#NULL!	2013-12-10	4	3	3	2	1	2	0	0	0	99	1	0	0	0	0	0	0	0.62253	2
chenhong	2013-10-11	1	48.0196	1	0	0	0	0	0	1	1	0	0	0	0	0	0	2.9	26.4	1.35	3.05	2.19	0.72	130	85	130	80	125	80	2014-01-08	4	3	3	3	2	0	1	0	0	89	1	0	0	0	0	0	0	0.691274	2
liyunsheng	2013-10-11	0	55.9788	1	0	1	0	1	0	0	1	0	0	0	0	0	0	7.8	25.7	1.07	3.81	2.95	0.81	130	85	130	80	130	80	2014-01-14	3	3	2	2	2	2	1	0	0	95	1	0	0	0	0	0	0	0.66961	2
pengjing	2012-02-07	1	49.9185	1	0	0	0	0	0	0	1	0	0	1	0	0	0	0.5	13.6	1.26	3.12	1.68	0.95	125	75	160	100	150	100	2012-05-15	3	0	0	0	0	2	0	0	0	98	0	0	0	0	0	0	0	0.627661	2
zhangzenge	2012-03-17	1	54	1	0	0	1	1	0	0	1	0	0	0	1	1	0	0	25	1.4	3.79	2.77	0.73	150	100	150	90	150	90	2012-06-16	4	0	0	0	0	1	0	0	0	91	0	0	0	0	0	0	0	0.595949	2
zhangzhaoxun	2012-04-05	1	64.978	1	0	1	1	0	0	0	0	0	0	1	0	0	0	45.9	17.6	0.87	3.19	2.1	0.68	140	90	145	85	140	80	2012-07-10	3	0	0	0	0	2	0	0	0	96	0	0	0	0	0	0	0	0.773476	3
madianlin	2012-05-31	1	61.0002	0	0	0	0	0	0	0	0	0	0	0	0	0	0	1.4	13.7	0.86	3.47	2.15	1.17	116	74	136	95	117	72	2012-09-05	2	1	1	0	0	0	0	0	0	97	0	0	0	0	0	0	0	0.640414	2
wuliping	2012-11-26	0	57.0013	1	0	0	0	0	0	0	0	0	0	1	0	0	0	3.22	11.1	1.32	6.56	5.27	1.08	130	90	140	90	160	80	2013-02-25	3	0	0	0	0	2	0	0	0	91	0	0	0	0	0	0	0	0.679502	2
xiaojunhua	2012-03-08	0	53.9304	1	1	0	1	0	0	0	0	0	0	1	0	0	1	2.6	12.2	3.25	4.88	2.8	0.89	#NULL!	#NULL!	#NULL!	#NULL!	#NULL!	#NULL!	2012-06-10	3	3	3	3	2	1	1	1	0	94	1	0	0	2	1	0	0	0.682097	2
dufengqin	2013-07-09	0	61.9883	1	0	1	0	0	0	0	0	0	0	0	0	0	0	1	22.2	2.02	4.71	3.06	0.82	120	80	130	80	130	80	2013-10-12	4	0	3	2	2	0	1	0	0	95	1	0	0	2	1	0	0	0.554477	2
shijingqia	2013-08-13	1	59.9585	1	0	0	0	1	0	1	1	0	0	1	0	0	0	1.24	13.4	1.02	2.73	1.42	0.8	142	82	140	78	140	80	2013-11-20	3	3	3	3	2	2	1	0	0	99	1	0	0	2	1	0	0	0.752297	3
wangdecheng	2013-12-31	1	50.0524	1	0	0	1	1	0	0	0	1	0	0	0	0	0	4.3	20.3	0.63	4.24	2.18	1.59	130	80	120	80	120	75	2014-04-02	4	0	0	2	2	2	0	0	0	92	1	0	0	2	1	0	0	0.603177	2
wangyue	2011-12-31	1	72.1112	1	0	0	0	0	0	1	1	0	0	1	0	0	0	1	21.7	0.93	4.08	1.95	1.38	117	85	120	85	145	90	2012-03-25	3	5	5	3	3	0	0	0	0	85	1	0	0	4	0	0	1	0.550209	2
zhangzhiguo	2012-03-15	0	81.9606	1	0	1	0	0	0	0	0	0	0	1	1	1	0	4.1	21.4	1.86	2.62	1.14	0.77	160	95	120	70	120	60	2012-06-20	2	2	2	1	0	1	0	0	0	97	1	0	0	4	0	0	1	0.576368	2
daishulan	2013-04-29	1	63.9523	0	0	0	1	0	0	1	0	0	0	0	0	0	0	2.12	29	1.3	4.74	3.29	0.98	#NULL!	#NULL!	#NULL!	#NULL!	#NULL!	#NULL!	2013-07-28	2	4	4	3	3	0	1	1	0	90	1	0	0	4	0	0	1	0.602526	2
biyongshun	2011-06-29	1	58.9614	1	0	0	1	1	0	1	1	0	0	1	1	1	0	7.28	17.18	1.72	5.1	3.34	1.16	160	80	160	90	160	80	2011-09-30	4	3	3	2	2	0	1	1	1	93	1	0	0	0	0	0	0	0.626145	2
chenglianzhong	2011-10-14	1	68.0886	1	0	0	1	0	0	1	0	0	0	0	0	0	0	1	18.4	0.54	3.87	1.81	1.5	200	120	160	90	140	80	2012-01-15	3	6	5	4	4	2	3	2	1	93	1	0	0	0	0	0	0	0.633769	2
chenlong	2012-01-31	1	58.9206	0	0	0	0	0	0	1	1	0	0	0	0	0	0	0.9	12.9	2.04	4.51	2.62	0.83	168	85	130	85	145	93	2012-05-01	6	5	5	4	4	0	2	1	1	91	1	0	0	0	0	0	0	0.61438	2
cuifengcheng	2012-04-12	1	61.9997	1	0	0	1	0	0	0	0	0	0	1	0	0	0	1.3	#NULL!	1.15	2.53	1.2	1.15	150	95	122	87	140	90	2012-07-16	5	4	3	3	3	1	2	1	1	95	1	0	0	0	0	0	0	0.650019	2
cuiguangchen	2012-08-09	0	56.068	1	1	0	0	0	0	0	0	0	0	1	0	0	1	0.1	10.6	0.5	3.02	1.71	1.23	100	86	110	70	120	70	2012-11-14	4	2	2	3	2	1	1	1	1	97	1	0	0	0	0	0	0	0.726543	3
cuijinling	2012-08-08	1	51.0005	1	0	0	1	0	0	0	0	1	0	1	0	0	0	4.7	18.7	3.53	3.49	1.54	0.48	126	80	130	90	130	80	2012-11-11	6	5	5	5	5	1	3	2	1	95	0	0	0	0	0	0	0	0.595963	2
dingguibao	2012-03-27	1	71.9813	1	1	0	0	0	0	1	1	0	0	1	0	0	1	2.22	25	1.7	4	2.21	1.1	150	97	141	94	129	89	2012-06-20	3	7	3	3	3	1	2	2	1	85	1	0	1	1	0	0	0	0.564992	2
dongqiuguo	2012-07-05	1	59.9577	1	1	0	0	1	0	0	0	0	0	1	1	1	0	1.12	35.8	1.8	4.02	2.81	0.8	120	80	115	75	110	80	2012-10-05	3	7	4	4	3	1	1	0	1	92	1	0	1	1	0	0	0	0.24278	1
fangguangshun	2012-09-27	0	66.0815	0	1	0	0	0	0	0	0	0	0	0	0	0	1	2.24	9.5	1.46	4.15	2.86	0.89	110	70	120	70	120	80	2012-12-30	3	4	4	3	3	0	1	1	1	94	1	0	0	4	0	0	1	0.694388	2
gaoshan	2011-07-27	1	70.9512	1	0	0	1	0	0	1	1	0	0	0	0	0	0	3.8	15	2.29	3.97	1.94	1.04	160	90	150	85	150	85	2011-11-01	7	6	6	5	5	1	3	2	2	97	1	0	0	0	0	0	0	0.751222	3
gaoshuzhen	2011-10-18	0	75.0513	1	0	0	0	0	0	0	0	0	0	0	0	0	0	3.1	24.4	2.22	5.08	2.98	0.99	145	85	140	90	140	80	2012-01-17	9	7	7	6	5	2	3	2	2	91	1	0	0	0	0	0	0	0.610594	2
gaowenxiu	2011-11-01	0	55.019	1	0	0	0	0	0	0	0	0	0	0	0	0	0	3.2	22.2	0.65	4.93	3.05	1.38	140	80	#NULL!	#NULL!	#NULL!	#NULL!	2012-02-01	5	3	3	3	3	2	2	2	2	92	1	0	0	0	0	0	0	0.571766	2
gaoyuru	2011-11-15	1	68.0986	1	0	0	1	0	0	0	1	1	0	0	0	0	0	2.3	12.9	4.7	7	3.01	1.31	220	140	999	999	999	999	2012-02-12	6	5	5	4	4	2	3	2	2	89	1	0	0	0	0	0	0	0.619805	2
gengxiangjie	2011-11-21	1	42.0201	1	0	0	1	0	0	0	1	0	0	0	0	0	0	5.4	17.1	3.24	4.14	1.43	0.96	160	90	160	95	155	95	2012-02-20	8	6	6	5	5	1	3	2	2	91	1	0	0	0	0	0	0	0.62318	2
guogang	2011-11-22	0	75.0212	0	0	0	0	1	0	0	0	0	0	0	1	1	0	4.9	12.8	1.54	2.77	1.33	0.64	140	80	130	70	125	80	2012-02-24	8	8	8	5	5	2	3	2	2	94	1	0	0	0	0	0	0	0.406027	1
hanbingyue	2012-03-24	1	56.9608	1	0	0	0	0	0	0	1	0	0	1	0	0	0	6.6	37	0.81	4.57	2.64	1.27	140	90	150	90	140	90	2012-06-10	2	1	1	0	0	2	2	2	2	78	1	0	0	0	0	0	0	0.73289	3
huangfuwang	2012-03-26	1	46.9696	1	0	0	1	0	0	1	1	0	0	1	0	0	0	1.33	14.5	1.3	3.9	2.57	1	151	87	126	82	150	80	2012-06-24	7	5	5	4	4	2	2	2	2	90	1	0	0	0	0	0	0	0.572329	2
hujingli	2012-04-11	1	64.9582	1	1	0	0	1	0	0	0	0	0	1	1	1	0	1	13.6	0.68	2.26	0.93	1.08	120	75	110	69	135	70	2012-07-17	6	5	5	5	5	2	2	2	2	97	1	0	0	0	0	0	0	0.439626	1
hujinping	2012-04-17	1	68.9488	1	1	0	1	0	0	0	0	0	0	1	0	0	0	2.22	11.8	2.11	4.2	2.88	1.11	144	88	160	90	100	80	2012-07-20	7	6	5	5	5	2	3	2	2	94	1	0	0	0	0	0	0	0.380122	1
huoyinyun	2012-04-25	1	40.9315	0	0	0	1	0	0	0	0	1	0	0	0	0	0	0.7	15.4	0.54	4.3	3.1	1.1	120	70	120	70	130	80	2012-07-30	6	6	5	4	4	1	3	2	2	96	1	0	0	0	0	0	0	0.49063	1
jiahaizhong	2012-05-10	1	39.9487	0	0	0	1	0	0	0	1	1	0	0	0	0	0	0	10.2	3.18	2.9	0.99	0.79	110	61	130	80	109	63	2012-08-10	7	5	5	4	4	2	2	2	2	92	1	0	0	0	0	0	0	0.719525	3
jianghuizhi	2012-05-25	1	41.0003	1	0	0	1	0	0	1	1	1	0	1	0	0	0	0.6	13.8	1.31	5.61	3.83	1.16	170	90	160	90	160	100	2012-08-29	2	1	1	0	0	2	2	2	2	96	1	0	0	0	0	0	0	0.596886	2
jianglanzhen	2012-06-11	1	60.9491	0	1	0	1	0	0	0	1	0	0	0	0	0	0	2.3	16.7	1.59	8.16	3.69	1.42	150	90	148	95	128	89	2012-09-12	5	4	3	3	3	2	2	2	2	93	1	0	0	0	0	0	0	0.807405	3
jiaohongyun	2012-06-14	1	62.0388	0	0	0	1	0	0	1	1	1	0	0	0	0	0	5.7	14.9	3.81	5.96	3.33	1.14	130	80	130	70	120	70	2012-09-20	7	6	5	5	5	2	3	2	2	98	1	0	0	0	0	0	0	0.507332	2
jiaolikun	2012-06-20	0	59.0097	1	0	0	0	0	0	0	0	0	0	1	0	0	0	2.12	6.6	1.69	4.92	3.48	1.03	140	80	142	80	140	78	2012-09-18	5	4	4	3	3	2	2	2	2	90	1	0	0	0	0	0	0	0.585387	2
liangyun	2012-07-09	1	52.0508	1	0	0	0	0	0	0	0	0	0	1	0	0	0	0	14.4	2.65	5.25	2.9	1.1	210	110	189	112	180	100	2012-10-05	5	2	2	3	2	0	2	2	2	88	1	0	0	0	0	0	0	0.698186	3
lichange	2012-08-03	0	63.9991	0	0	0	0	0	0	0	0	0	0	0	0	0	0	5.12	#NULL!	2.23	5.84	3.36	1.11	130	85	140	80	130	80	2012-11-04	2	1	1	0	0	2	2	2	2	93	1	0	0	0	0	0	0	0.431663	1
lijianmin	2012-11-29	1	46.0122	1	0	0	1	0	0	0	1	0	0	0	0	0	0	#NULL!	6.2	1.23	4.32	2.51	0.96	132	85	110	66	116	66	2013-02-25	8	7	6	5	5	1	3	2	2	88	1	0	0	0	0	0	0	0.755592	3
lindingru	2013-03-01	0	77.98	0	0	0	0	0	0	0	0	0	0	0	0	0	0	1.9	15.6	2.25	5.42	4.09	1	150	80	160	90	140	100	2013-05-28	7	7	6	5	5	0	3	2	2	88	1	0	0	0	0	0	0	0.71971	3
liubin	2013-03-15	1	46.9902	0	0	0	0	0	0	0	0	1	0	0	0	0	0	1.02	34.7	1.78	5.96	4.41	0.85	#NULL!	#NULL!	#NULL!	#NULL!	#NULL!	#NULL!	2013-06-20	7	6	6	5	5	1	3	2	2	97	1	0	0	0	0	0	0	0.691956	2
liuchunming	2013-03-29	0	67.9817	0	1	0	1	0	0	0	0	0	0	0	0	0	1	1.11	18.9	0.89	3.57	0.89	2.52	#NULL!	#NULL!	#NULL!	#NULL!	#NULL!	#NULL!	2013-06-30	8	7	7	5	5	2	3	2	2	93	1	0	0	0	0	0	0	0.632731	2
liuyouke	2013-06-17	0	59.0201	1	1	0	1	0	0	0	0	0	0	0	0	0	0	0.3	11.4	0.83	3.83	2.19	1.18	140	80	140	75	140	75	2013-09-22	5	5	5	5	5	2	2	2	2	97	1	0	0	0	0	0	0	0.662817	2
liuzhiqiang	2013-09-11	1	55.9795	1	0	0	0	0	0	1	1	0	0	1	0	0	0	1.1	28.2	2.29	4.35	2.77	0.79	120	80	120	85	125	85	2013-12-10	6	5	5	5	5	0	2	2	2	90	1	0	0	0	0	0	0	0.6114	2
liyoujin	2013-09-27	1	61.9698	1	1	0	1	0	0	1	0	0	0	1	0	0	1	1.1	15.1	1.36	5.39	4	1.07	140	90	130	70	130	80	2013-12-28	8	5	5	5	5	1	3	2	2	92	1	0	0	0	0	0	0	0.727956	3
lizhenhua	2013-09-27	1	62.0719	0	1	0	0	1	0	0	0	0	0	0	1	1	0	4.2	23.1	3.79	4.58	2.42	0.61	140	100	150	95	160	90	2013-12-24	5	5	5	4	4	2	2	1	2	88	1	0	0	0	0	0	0	0.579402	2
lizhenyou	2013-10-14	1	55.0607	1	0	0	1	0	0	1	0	0	0	1	0	0	0	1	7.09	1.14	3.91	2.31	1.13	148	89	140	85	140	85	2014-01-14	4	4	4	3	3	1	2	2	2	92	1	0	0	0	0	0	0	0.562244	2
lulun	2013-10-17	1	59.9993	0	0	0	0	0	0	0	0	0	0	0	0	0	1	2.5	16.5	2.32	3.3	1.66	0.71	157	91	#NULL!	#NULL!	#NULL!	#NULL!	2014-01-18	6	6	6	4	4	1	2	2	2	93	1	0	0	0	0	0	0	0.806935	3
marongxiu	2013-10-21	1	64.0717	1	0	0	1	0	0	1	0	0	0	0	1	1	0	13.6	13.7	0.65	3.89	3.04	0.93	120	70	140	90	140	80	2014-01-25	7	7	6	5	5	1	3	2	2	96	1	0	0	0	0	0	0	0.71696	3
maxiaohui	2013-10-29	0	58.0505	1	0	0	0	0	0	0	0	0	0	0	0	0	0	2.4	6.78	2.58	6.62	4.45	1.12	150	90	148	90	148	90	2014-01-26	4	1	1	0	0	2	2	2	2	89	1	0	0	0	0	0	0	0.606238	2
meiguirong	2013-12-02	0	65.0072	1	0	1	0	1	0	0	0	0	0	1	1	1	1	1.6	10.7	1.31	4.14	3.04	0.85	180	102	#NULL!	#NULL!	#NULL!	#NULL!	2014-03-10	7	6	6	5	5	1	3	2	2	98	1	0	0	0	0	0	0	0.632295	2
niufengyou	2013-12-16	0	62.0895	0	0	0	0	1	0	0	0	0	0	0	1	1	0	0.281	11.7	0.84	3.95	2.2	1.28	142	89	#NULL!	#NULL!	#NULL!	#NULL!	2014-03-14	8	8	7	5	5	1	3	2	2	88	1	0	0	0	0	0	0	0.669035	2
niukun	2013-12-31	1	47.0206	1	0	1	0	0	1	0	1	1	0	1	1	1	0	4.5	29	1.12	4.67	2.65	1.29	142	91	#NULL!	#NULL!	#NULL!	#NULL!	2014-04-02	5	4	3	3	3	1	2	2	2	92	1	0	0	0	0	0	0	0.941203	3
qinxueyan	2012-09-27	0	66.9813	0	0	1	1	0	0	0	0	0	0	1	0	0	0	3	12.4	0.93	4.99	4.83	1.33	130	80	135	85	130	80	2012-12-30	7	7	6	5	5	0	3	2	2	94	0	0	0	0	0	0	0	0.598989	2
shangqiang	2011-12-21	0	58.0699	1	0	0	0	0	0	0	0	0	0	1	0	0	0	1	12.3	0.92	3.65	1.79	1.04	170	80	130	80	130	80	2012-03-22	4	8	6	6	4	1	2	2	2	92	1	0	1	1	0	0	0	0.64612	2
wangchangying	2012-01-05	0	67.0002	1	0	0	0	0	0	0	0	0	0	1	0	0	0	6.7	27.5	1.25	4.68	3.09	0.9	140	85	170	80	150	80	2012-04-10	4	3	4	6	4	2	2	2	2	96	1	0	0	2	1	0	0	0.539977	2
wanggengshen	2012-03-16	1	67.9201	1	1	0	1	1	0	0	0	0	0	0	1	1	1	1.4	15.3	0.77	4.02	2.3	1.31	165	105	150	95	140	83	2012-06-20	4	3	3	6	4	1	2	2	2	96	1	0	0	2	1	0	0	0.700657	3
wangqingshe	2012-07-06	1	58	1	1	0	1	0	0	0	0	0	0	1	0	0	1	2.1	15.9	2.48	2.73	1.42	0.63	170	111	176	105	183	108	2012-10-11	7	7	8	6	6	1	3	2	2	97	1	0	0	2	1	0	0	0.656099	2
wangshouchen	2013-10-11	0	68.9983	1	0	1	0	1	0	0	0	0	0	1	1	1	0	2	16.5	0.77	4.67	3.62	1.08	130	70	125	70	130	75	2014-01-10	5	5	5	6	4	1	3	2	2	91	1	0	0	2	1	0	0	0.782453	3
wangshulan	2013-12-31	1	52.1015	1	0	0	1	0	0	0	1	0	0	0	0	0	0	1.9	14.3	1.42	6.09	5.11	1.11	160	100	140	90	100	60	2014-04-02	4	3	3	6	4	0	2	2	2	92	0	0	0	2	1	0	0	0.623944	2
wangtingcheng	2012-02-14	0	74.9298	1	1	0	0	1	0	0	0	0	0	1	1	1	0	1.7	7.74	1.13	4.69	2.68	1.09	155	70	145	68	150	62	2012-05-20	4	5	4	4	3	2	2	2	2	96	1	0	0	4	0	0	1	0.450598	1
wangyumin	2012-03-28	0	75.0219	1	0	0	1	0	0	0	0	0	0	1	0	0	0	2.5	#NULL!	0.53	2.51	1.11	1.21	173	85	150	60	153	65	2012-06-20	5	7	7	5	4	1	2	2	2	84	1	0	0	4	0	0	1	0.56337	2
wenlianshan	2012-05-09	1	80.0002	0	0	0	0	0	0	1	1	0	0	0	0	0	0	5.2	#NULL!	1.54	4.55	2.84	1.06	128	72	125	70	120	72	2012-08-10	6	7	7	6	5	0	2	2	2	93	1	0	0	4	0	0	1	0.379105	1
wuchenglai	2012-06-14	0	79.0297	1	1	0	0	1	0	0	0	0	0	1	1	1	1	11.5	16.5	1.79	6.45	4.08	1.34	230	91	173	93	184	89	2012-09-09	5	7	5	4	4	1	2	2	2	87	1	0	0	4	0	0	1	0.47612	1
xieyuzhen	2012-12-30	0	85.0504	1	1	0	0	0	0	0	0	0	0	1	0	0	1	14.8	8.33	1.79	6.16	3.87	1.04	135	60	130	64	123	70	2013-03-20	5	7	7	5	4	2	2	2	2	80	1	0	0	4	0	0	1	0.44424	1
xuyuying	2013-06-18	1	78.0109	0	0	1	0	1	0	0	0	0	0	0	1	1	0	3.4	11.6	1.18	4.16	2.46	1.06	#NULL!	#NULL!	#NULL!	#NULL!	#NULL!	#NULL!	2013-09-12	4	5	5	4	3	1	2	2	2	86	1	0	0	4	0	0	1	0.569933	2
yangmingjie	2012-03-15	1	58.9584	0	0	0	1	0	0	0	1	0	0	0	0	0	0	1.4	24.6	1.3	4.62	3.21	1.31	140	90	140	80	140	90	2012-06-06	4	5	5	4	3	1	2	2	2	83	0	0	0	4	0	0	1	0.471062	1
yaozhendong	2012-09-14	1	48.9909	1	0	0	1	0	0	0	1	0	0	1	0	0	0	22.8	21.4	1.32	5.54	5.31	0.85	140	80	120	80	120	70	2012-12-18	9	6	5	5	5	0	3	2	3	95	1	0	0	0	0	0	0	0.715321	3
[truncated: 41 more columns]
